# Supplementary material
Source: PubMed Central journal article supplement (PMC2666357)
Supplement: jn.108.103341_1.pdf [file jn.108.103341_1.pdf]

Online Supporting Material

Supplemental Table 1. Quantitative Realtime PCR primers

---

| Gene     | Forward Primer                | Reverse Primer                 |
|----------|-------------------------------|--------------------------------|
| NPC1L1   | 5'-TGGACTGGAAGGACCATTTC-3'    | 5'-AGACGTGCCATCTTTGAACGT-3'    |
| SR-BI    | 5'-GCCAGCGGGCCTTTATG-3'       | 5'-TCTTCGTAGCCCCACAGGAT-3'     |
| ABCA1    | 5'-CCCGGCGGAGTAGAAAGG-3'      | 5'-AGGGCGATGCAAACAAAGAC-3'     |
| SREBP-1c | 5'-TGATGGAGACAGGGAGTTCTCA-3'  | 5'-AGCGTCAGAACAGCTATTTAGCAA-3' |
| FAS      | 5'-GGCTCTATGGGTTGCCTAAGC-3'   | 5'-GGTGGACCCCAAAAAGGA-3'       |
| SCD1     | 5'-CGCCGTGGCTTTTTCTTC-3'      | 5'-CGGGTGTTTGCGCACAA-3'        |
| HMG-R    | 5'-CCCCACGTTACCCCTTGA-3'      | 5'-TGGTGCCAACTCCAATCACA-3'     |
| ACAT1    | 5'-TCCTCGGCCATGGAGTCAT-3'     | 5'-GCGCTGTCGAGCATACCA-3'       |
| ACAT2    | 5'-GTACGCTCGGCGACTGT-3'       | 5'-TGTCACCAGCTCCCAAATG-3'      |
| MTP      | 5'-GCGTGGGCTACCGGATCT-3'      | 5'-GTCGGGATTCCTCCACAGTAAC-3'   |
| Apobec-1 | 5'-ACTACTCCCCTTCGAATGAAGCT-3' | 5'-CGTACAGCCTCACCCACAGA-3'     |
| GAPDH    | 5'-CCTGGAGAAACCTGCCAAGTAT-3'  | 5'-CTCGGCCGCCTGCTT-3'          |

---
